# Supplementary material
Source: PubMed Central journal article supplement (PMC3225057)
Supplement: Supp_Data.pdf [file Supp_Data.pdf]

## Supplementary Data

SUPPLEMENTARY TABLE S1. EFFECT MODIFICATION BY RACE/ETHNIC GROUP ON GENETIC ASSOCIATIONS BETWEEN FIRST METABOLIC SYNDROME PRINCIPAL COMPONENT AND EIGHT RISK LOCI IN THE NATIONAL HEALTH AND NUTRITION EXAMINATION SURVEY III

| SNP, nearest gene, chromosome, and risk allele |              |                          |   | <i>Non-Hispanic whites</i> |                          | <i>Non-Hispanic blacks</i> |             |                          | <i>Mexican American</i>  |       |       |
|------------------------------------------------|--------------|--------------------------|---|----------------------------|--------------------------|----------------------------|-------------|--------------------------|--------------------------|-------|-------|
|                                                | Effect size  | $P_{\text{main effect}}$ |   | Effect size                | $P_{\text{main effect}}$ | $P_{\text{interaction}}$   | Effect size | $P_{\text{main effect}}$ | $P_{\text{interaction}}$ |       |       |
| rs1260326                                      | <i>GCKR</i>  | 2                        | C | -0.021                     | 0.69                     | -0.11                      | 0.041       | 0.41                     | 0.086                    | 0.078 | 0.12  |
| rs7578326                                      | <i>IRS1</i>  | 2                        | A | 0.015                      | 0.75                     | 0.041                      | 0.047       | 0.64                     | 0.094                    | 0.097 | 0.21  |
| rs4675095                                      | <i>IRS1</i>  | 2                        | T | -0.023                     | 0.78                     | 0.13                       | 0.12        | 0.17                     | 0.24                     | 0.013 | 0.042 |
| rs6926728                                      | <i>ENPP1</i> | 6                        | G | 0.020                      | 0.77                     | -0.0052                    | 0.93        | 0.72                     | 0.0050                   | 0.93  | 0.90  |
| rs174550                                       | <i>FADS1</i> | 11                       | T | 0.019                      | 0.65                     | 0.042                      | 0.38        | 0.59                     | -0.078                   | 0.11  | 0.22  |
| rs35767                                        | <i>IGF1</i>  | 12                       | G | 0.0080                     | 0.91                     | 0.036                      | 0.51        | 0.75                     | 0.037                    | 0.53  | 0.77  |
| rs9939609                                      | <i>FTO</i>   | 16                       | A | 0.092                      | 0.070                    | -0.0070                    | 0.91        | 0.29                     | -0.029                   | 0.63  | 0.17  |
| rs11152213                                     | <i>MCR4</i>  | 18                       | C | 0.057                      | 0.37                     | 0.034                      | 0.56        | 0.80                     | -0.066                   | 0.38  | 0.30  |

Effect modification by race/ethnic group of eight risk single-nucleotide polymorphisms (SNPs) on the first principal component of log homeostasis model assessment of insulin resistance (logHOMA-IR), log triglycerides (logTG), body mass index (BMI), and waist circumference (eigenvalue 2.53, explained variance 63%). Effects sizes are presented as beta coefficients for each SNP in age/sex-adjusted allelic linear regression models performed separately in each race/ethnic group.  $P$  values correspond to those beta coefficients ( $P_{\text{main effect}}$ ) and race/ethnic group-SNP interaction terms from models run in the entire multi-ethnic sample with whites as the referent group ( $P_{\text{interaction}}$ ). Thresholds for statistical significance were 0.0021 for main effects and 0.0031 for SNP-race/ethnicity interaction.
